# Supplementary material
Source: PubMed Central journal article supplement (PMC138612)
Supplement: pnas_212624599_2.pdf [file pnas_212624599_2.pdf]

**Table 2. Analysis of *AGL24* expression and flowering time under LDs in *AGL24-RNAi* transgenic lines**

| Genotype                      | Relative <i>AGL24</i><br>mRNA level* | Rosette leaves | SD  | Range | <i>n</i> |
|-------------------------------|--------------------------------------|----------------|-----|-------|----------|
| Columbia wild type            | 1.0                                  | 16.5           | 0.8 | 14-19 | 22       |
| <i>AGL24-RNAi</i> (no. 2-3)   | 0.8                                  | 17.5           | 0.9 | 15-20 | 11       |
| <i>AGL24-RNAi</i> (no. 4-1)   | 0.2                                  | 19.6           | 0.3 | 17-21 | 8        |
| <i>AGL24-RNAi</i> (no. 5-8)   | †                                    | 22.7           | 0.7 | 19-24 | 20       |
| <i>AGL24-RNAi</i> (no. 7-13)  | 0.8                                  | 16.9           | 1.3 | 14-19 | 9        |
| <i>AGL24-RNAi</i> (no. 12-8)  | 0.4                                  | 18.7           | 0.6 | 16-21 | 17       |
| <i>AGL24-RNAi</i> (no. 13-3)  | 0.1                                  | 20.7           | 1.0 | 18-23 | 7        |
| <i>AGL24-RNAi</i> (no. 15-7)  | 0.3                                  | 19.0           | 0.3 | 17-21 | 9        |
| <i>AGL24-RNAi</i> (no. 18-3)  | 0.3                                  | 19.3           | 0.8 | 16-22 | 16       |
| <i>AGL24-RNAi</i> (no. 23-8)  | 0.4                                  | 18.8           | 0.9 | 16-22 | 14       |
| <i>AGL24-RNAi</i> (no. 28-3)  | 0.8                                  | 17.3           | 0.6 | 15-19 | 13       |
| <i>AGL24-RNAi</i> (no. 35-17) | †                                    | 23.6           | 1.0 | 20-27 | 19       |

\* *AGL24* expression was determined by RT-PCR analysis of total RNA from 5-day-old whole seedlings grown in long days. RT-PCR was performed as stated in *Materials and Methods*. The relative level of *AGL24* accumulation was calculated as stated for Fig. 7 with the value of Columbia wild-type plants set as 1.0. Among 30 *AGL24-RNAi* mutants showing late flowering, 12 plants containing one copy of the transgene were used for the expression analysis.

† *AGL24* expression is below the level of detection.
