# Supplementary material
Source: PubMed Central journal article supplement (PMC138612)
Supplement: pnas_212624599_3.pdf [file pnas_212624599_3.pdf]

**Table 3. Analysis of *AGL24* expression and flowering time under LDs in *35S::AGL24* transgenic lines**

| Genotype                     | Relative <i>AGL24</i> |                |     |       |          |
|------------------------------|-----------------------|----------------|-----|-------|----------|
|                              | mRNA level*           | Rosette leaves | SD  | Range | <i>n</i> |
| Columbia wild type           | 1.0                   | 16.7           | 0.8 | 14-19 | 25       |
| <i>35S::AGL24</i> (no. 1-6)  | 2.7                   | 14.5           | 0.9 | 13-17 | 8        |
| <i>35S::AGL24</i> (no. 2-2)  | 3.1                   | 13.9           | 0.7 | 12-16 | 11       |
| <i>35S::AGL24</i> (no. 2-8)  | 6.4                   | 11.7           | 0.5 | 9-13  | 20       |
| <i>35S::AGL24</i> (no. 2-13) | 1.0                   | 15.9           | 1.6 | 14-19 | 8        |
| <i>35S::AGL24</i> (no. 3-1)  | 5.7                   | 12.2           | 0.7 | 10-15 | 7        |
| <i>35S::AGL24</i> (no. 3-5)  | 5.9                   | 12.0           | 0.3 | 10-15 | 18       |
| <i>35S::AGL24</i> (no. 3-6)  | 2.9                   | 14.6           | 1.1 | 12-17 | 7        |
| <i>35S::AGL24</i> (no. 3-9)  | 1.3                   | 15.0           | 1.3 | 13-17 | 12       |
| <i>35S::AGL24</i> (no. 3-19) | 6.9                   | 11.3           | 0.6 | 8-13  | 15       |
| <i>35S::AGL24</i> (no. 4-2)  | 4.7                   | 13.3           | 1.8 | 10-16 | 6        |
| <i>35S::AGL24</i> (no. 4-5)  | 4.7                   | 13.7           | 1.4 | 11-17 | 8        |
| <i>35S::AGL24</i> (no. 4-9)  | 3.0                   | 14.6           | 1.0 | 12-17 | 9        |
| <i>35S::AGL24</i> (no. 5-1)  | 6.5                   | 11.8           | 0.8 | 8-13  | 13       |
| <i>35S::AGL24</i> (no. 5-7)  | 5.5                   | 12.7           | 0.9 | 10-15 | 10       |
| <i>35S::AGL24</i> (no. 6-7)  | 1.1                   | 15.5           | 0.8 | 12-18 | 11       |
| <i>35S::AGL24</i> (no. 7-3)  | 1.0                   | 16.1           | 1.2 | 13-19 | 17       |
| <i>35S::AGL24</i> (no. 7-13) | 2.7                   | 14.6           | 0.9 | 12-17 | 12       |
| <i>35S::AGL24</i> (no. 8-4)  | 6.7                   | 11.8           | 1.1 | 9-13  | 11       |
| <i>35S::AGL24</i> (no. 8-9)  | 1.1                   | 15.7           | 0.3 | 14-17 | 12       |

\* *AGL24* expression was determined by RT-PCR analysis of total RNA from 5-day-old whole seedlings grown in long days. RT-PCR was performed as stated in *Materials and Methods*. The relative level of *AGL24* accumulation was calculated as stated for Fig. 7 with the value of Columbia wild-type plants set as 1.0. Among 35 *35S::AGL24* plants showing early flowering, 19 plants containing one copy of the transgene were used for the expression analysis.
